# Supplementary material
Source: PubMed Central journal article supplement (PMC3713135)

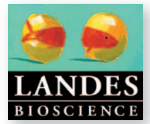

## **Supplemental Material to:**

**Yoko Naito, Norikazu Yabuta, Jun Sato, Shouichi Ohno,  
Muneki Sakata, Takashi Kasama, Masahito Ikawa and  
Hiroshi Nojima**

**Recruitment of cyclin G2 to promyelocytic leukemia  
nuclear bodies promotes dephosphorylation of  $\gamma$ H2AX  
following treatment with ionizing radiation**

**2013; 12(11)**

**<http://dx.doi.org/10.4161/cc.24878>**

**<http://www.landesbioscience.com/journals/cc/article/24878>**

**Figure S1. CycG1 is not recruited to PML-NBs in TIG-1 cells after IR.** (A) TIG-1 cells treated with IR and fixed after 0.5 h, 2 h, or 4 h. NT cells were used as a negative control. Cells were immunostained with anti-CycG1 and anti-PML antibodies. Bar = 10  $\mu\text{m}$ . (B) A magnified view of the cell encircled by a white rectangle (A); CycG1 (green) and PML (red).

**Figure S2. CycG2 localization is unchanged following replication stress and UV irradiation.**

(A) Cells were NT or treated with 10  $\mu\text{g/ml}$  of mitomycin C and incubated for 12 h. Cells were immunostained with anti-CycG2 and anti-PCNA antibodies. (B) Cells were NT or treated with UV irradiation (60  $\text{J/m}^2$ ) and incubated for 2 h. Cells were immunostained with anti-CycG2 and anti-PML antibodies. (A, B) DIC images are shown to illustrate the cell shape. Bar = 10  $\mu\text{m}$

Figure S1.

A

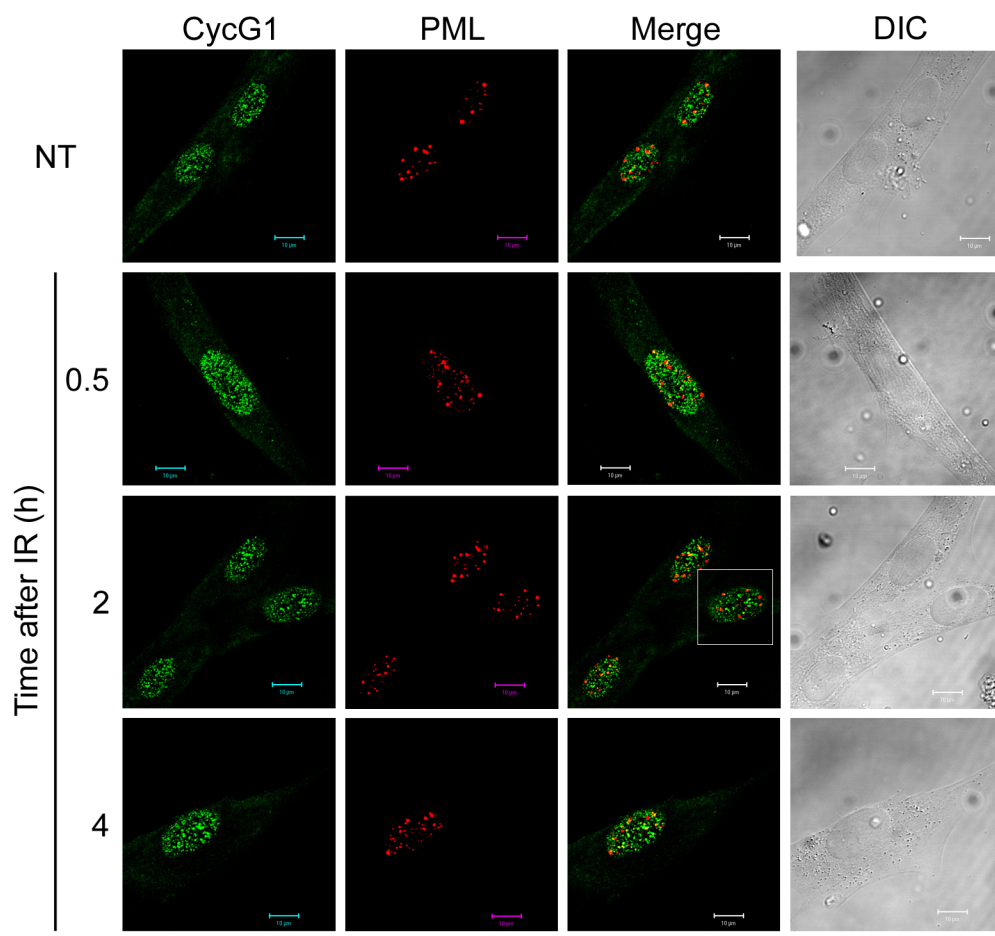

B

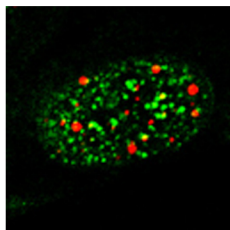

Figure S2. Naito & Yabuta et al.

A

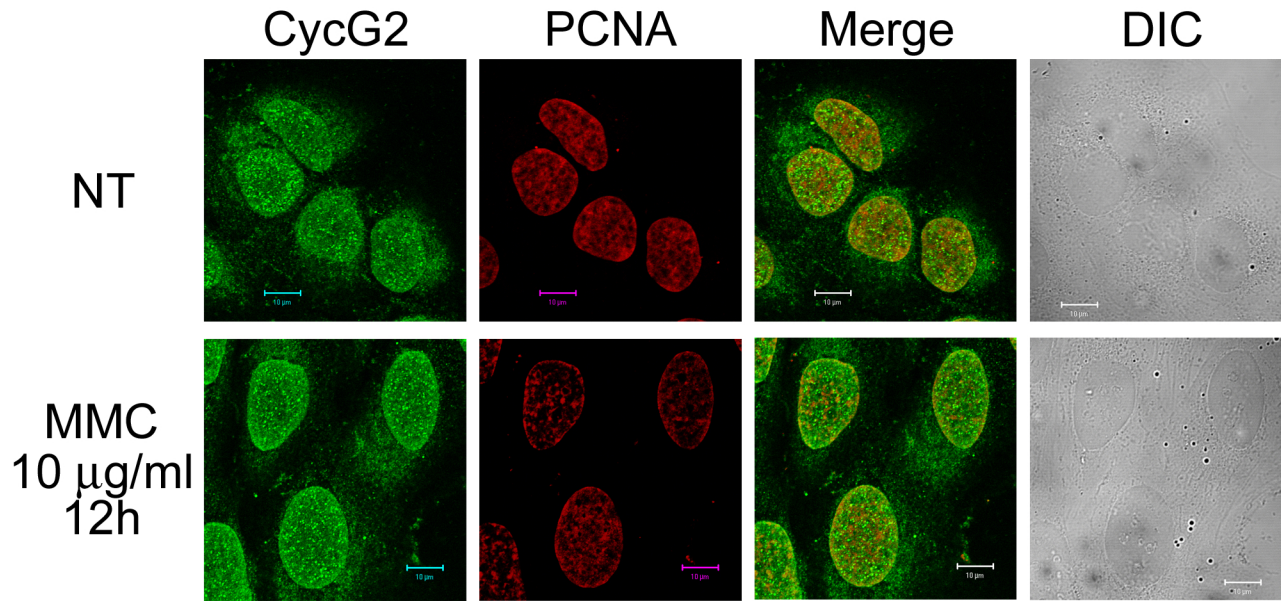

B

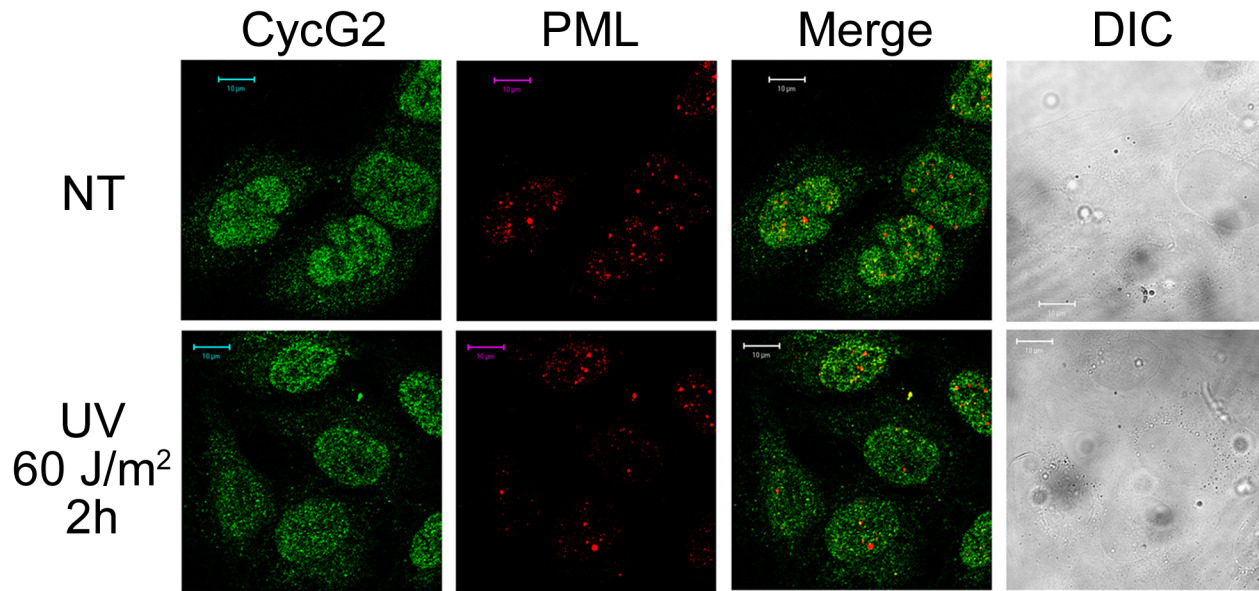

Supplement: cc-12-1773-s01.pdf [file cc-12-1773-s01.pdf]
